# Supplementary material for: Enhanced ionic conductivity of an F−-assisted Na3Zr2Si2PO12 solid electrolyte for solid-state sodium batteries
Source: Royal Society of Chemistry journal article supplement (doi:10.1039/c9ta12213c), 2020-01-01
Supplement: c9ta12213c1.pdf [file c9ta12213c1.pdf]

# Enhanced ionic conductivity of F<sup>-</sup>-assisted Na<sub>3</sub>Zr<sub>2</sub>Si<sub>2</sub>PO<sub>12</sub> solid electrolyte for solid-state sodium batteries

*Shengnan He,<sup>1,2</sup> Youlong Xu, \*<sup>1,2</sup> Yanjun Chen,<sup>1,2</sup> Xiaoning Ma<sup>1,2</sup>*

<sup>1</sup>Electronic Materials Research Laboratory, Key Laboratory of the Ministry of Education & International Center for Dielectric Research, Xi'an Jiaotong University, No.28, Xianning West Road, Xi'an, Shaanxi, 710049, PR China

<sup>2</sup>Shaanxi Engineering Research Center of Advanced Energy Materials & Devices, Xi'an Jiaotong University, No.28, Xianning West Road, Xi'an, Shaanxi, 710049, PR China

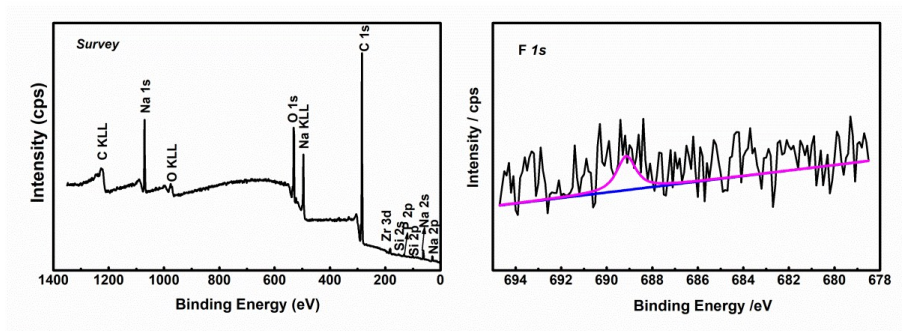

Fig.S1. XPS spectra of the interior of NZSPF0.7 pellets; (a) survey spectra, (b)  $F_{1s}$ .

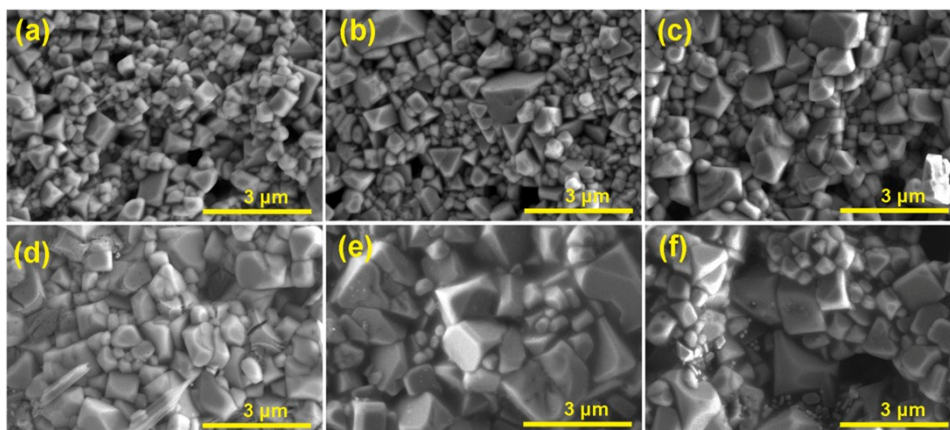

Fig.S2.SEM images of the surface of NZSPFx pellets. (a)  $x=0$ , (b)  $x=0.1$ , (c)  $x=0.3$ , (d)  $x=0.5$ , (e)  $x=0.7$  and (f)  $x=1.0$ .

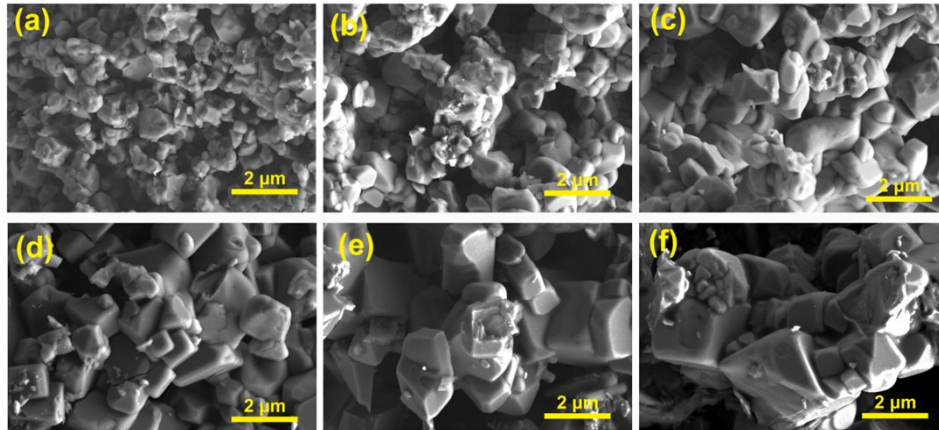

Fig.S3. SEM images of the powder of NZSPFx pellets. (a)  $x=0$ , (b)  $x=0.1$ , (c)  $x=0.3$ , (d)  $x=0.5$ , (e)  $x=0.7$  and (f)  $x=1.0$ .

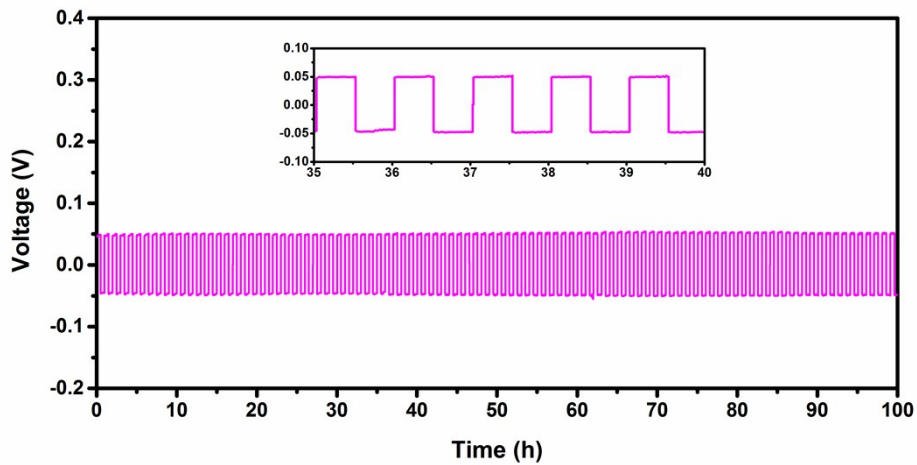

Fig.S4. Galvanostatic cycling of NZSPF0.7 at  $0.2 \text{ mA cm}^{-2}$  at room temperature using Na/NZSPF0.7/Na symmetrical cell (the inset shows the enlarged of partial galvanostatic cycling).

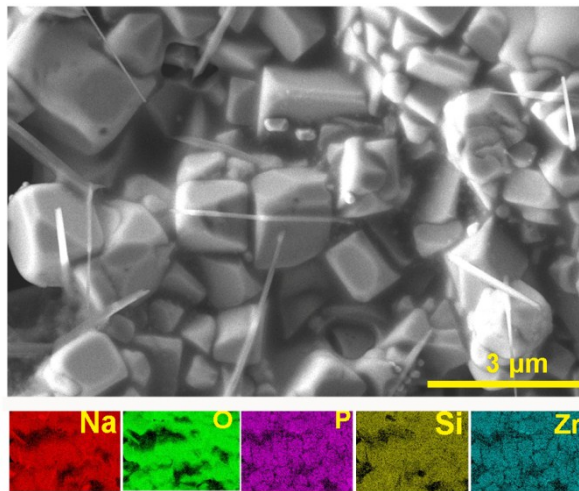

Fig. S5. SEM images of the surface of NZSPF0.7 solid electrolyte after cycling at 1C for 100 cycles.

Table S1

the composition of each samples (x=0, 0.1, 0.3, 0.5, 0.7, 1.0) calculated according to the refinement of the XRD patterns、 the stoichiometry analysis based on the XPS data as well as the EDS data are listed in Table S1 in the revised supporting information.

| sample | Composition                                                                                                  |
|--------|--------------------------------------------------------------------------------------------------------------|
| x=0    | $\text{Na}_{3.0061}\text{Zr}_{2.0016}\text{Si}_{2.0125}\text{P}_{0.9875}\text{O}_{12}$                       |
| x=0.1  | $\text{Na}_{2.9950}\text{Zr}_2\text{Si}_{2.0054}\text{P}_{0.9946}\text{O}_{11.9896}\text{F}_{0.0104}$        |
| x=0.3  | $\text{Na}_{2.9865}\text{Zr}_{1.9986}\text{Si}_{2.0097}\text{P}_{0.9903}\text{O}_{11.9712}\text{F}_{0.0288}$ |
| x=0.5  | $\text{Na}_{2.9923}\text{Zr}_{1.9943}\text{Si}_{2.0109}\text{P}_{0.9891}\text{O}_{11.9586}\text{F}_{0.0414}$ |
| x=0.7  | $\text{Na}_{2.9781}\text{Zr}_{1.9954}\text{Si}_{2.0094}\text{P}_{0.9906}\text{O}_{11.9503}\text{F}_{0.0497}$ |
| x=1.0  | $\text{Na}_{2.9748}\text{Zr}_{1.9952}\text{Si}_{2.0086}\text{P}_{0.9914}\text{O}_{11.9470}\text{F}_{0.0530}$ |

Table S2

The features of P 2p spectra of NZSPF<sub>x</sub> (x=0 and 0.7) solid electrolytes.

| Sample | Bonding energy (eV) | Peak area (CPS eV) |
|--------|---------------------|--------------------|
| x=0    | 132.7               | 40699.15           |
| x=0.7  | 133.1               | 39186.20           |
